# Supplementary material for: The Influence of Phosphorus Substituents on the Structures and Solution Speciation of Trivalent Uranium and Lanthanide Phosphinodiboranates
Source: PubMed Central journal article supplement (PMC11134491; doi:10.1021/acs.inorgchem.3c02773), 2023-11-27
Supplement: ic3c02773_si_002.pdf [file ic3c02773_si_002.pdf]

## SUPPORTING INFORMATION

### **The Influence of Phosphorus Substituents on the Structures and Solution Speciation of Trivalent Uranium and Lanthanide Phosphinodiboranates**

Joshua C. Zgrabik,<sup>1</sup> Rina Bhowmick,<sup>2</sup> Francesca D. Eckstrom,<sup>1</sup> A. Rayford Harrison,<sup>1</sup> Taylor V. Fetrow,<sup>1</sup> Anastasia V. Blake,<sup>1</sup> Bess Vlasisavljevic,<sup>2,\*</sup> Scott R. Daly<sup>1,\*</sup>

<sup>1</sup>Department of Chemistry, The University of Iowa, E331 Chemistry Building, Iowa City, Iowa 52242, United States

<sup>2</sup>Department of Chemistry, The University of South Dakota, 414 E Clark St., Vermillion SD, 57069, United States.

Corresponding email: [scott-daly@uiowa.edu](mailto:scott-daly@uiowa.edu); [Bess.Vlasisavljevic@usd.edu](mailto:Bess.Vlasisavljevic@usd.edu)

#### **Table of Contents**

|                              |     |
|------------------------------|-----|
| <b>I. XRD data</b> .....     | S2  |
| <b>II. NMR spectra</b> ..... | S6  |
| <b>III. IR spectra</b> ..... | S16 |
| <b>IV. DFT data</b> .....    | S18 |

## I. XRD data

**Table S1.** Crystallographic data.

|                                                          | U- <sup>1</sup> Pr                                              | Nd- <sup>1</sup> Pr                                              | Sm- <sup>1</sup> Pr                                              | Tb- <sup>1</sup> Pr                                              | Er- <sup>1</sup> Pr                                              | Nd-Et                                                            | U-Me                                                           | Nd-Et-THF                                                                       |
|----------------------------------------------------------|-----------------------------------------------------------------|------------------------------------------------------------------|------------------------------------------------------------------|------------------------------------------------------------------|------------------------------------------------------------------|------------------------------------------------------------------|----------------------------------------------------------------|---------------------------------------------------------------------------------|
| Identifier                                               | Dal20_29                                                        | Dal19_60                                                         | Dal18_45                                                         | Dal22_2                                                          | Dal18_52                                                         | Dal20_61                                                         | Dal17_35                                                       | Dal20_58                                                                        |
| Formula                                                  | C <sub>18</sub> H <sub>60</sub> B <sub>6</sub> P <sub>3</sub> U | C <sub>18</sub> H <sub>60</sub> B <sub>6</sub> P <sub>3</sub> Nd | C <sub>18</sub> H <sub>60</sub> B <sub>6</sub> P <sub>3</sub> Sm | C <sub>18</sub> H <sub>60</sub> B <sub>6</sub> P <sub>3</sub> Tb | C <sub>18</sub> H <sub>60</sub> B <sub>6</sub> P <sub>3</sub> Er | C <sub>12</sub> H <sub>48</sub> B <sub>6</sub> P <sub>3</sub> Nd | C <sub>6</sub> H <sub>36</sub> B <sub>6</sub> P <sub>3</sub> U | C <sub>24</sub> H <sub>68</sub> B <sub>6</sub> O <sub>3</sub> P <sub>3</sub> Nd |
| FW (g·mol <sup>-1</sup> )                                | 672.46                                                          | 578.67                                                           | 584.78                                                           | 593.35                                                           | 601.69                                                           | 494.51                                                           | 504.15                                                         | 706.79                                                                          |
| crystal system                                           | monoclinic                                                      | monoclinic                                                       | monoclinic                                                       | monoclinic                                                       | monoclinic                                                       | monoclinic                                                       | monoclinic                                                     | triclinic                                                                       |
| space group                                              | P2 <sub>1</sub> /c                                              | P2 <sub>1</sub> /c                                               | P2 <sub>1</sub> /c                                               | P2 <sub>1</sub> /c                                               | P2 <sub>1</sub> /c                                               | C2/c                                                             | C2/c                                                           | P-1                                                                             |
| a (Å)                                                    | 10.9408(13)                                                     | 10.9622(11)                                                      | 10.9579(11)                                                      | 10.9639(11)                                                      | 10.9819(11)                                                      | 20.306(4)                                                        | 18.0385(9)                                                     | 10.5933(14)                                                                     |
| b (Å)                                                    | 13.1542(15)                                                     | 13.0969(13)                                                      | 13.1056(13)                                                      | 13.1097(13)                                                      | 12.9649(13)                                                      | 10.264(2)                                                        | 9.6543(5)                                                      | 13.6785(19)                                                                     |
| c (Å)                                                    | 23.150(3)                                                       | 23.014(2)                                                        | 22.776(2)                                                        | 22.694(2)                                                        | 22.500(2)                                                        | 13.073(3)                                                        | 12.6841(7)                                                     | 15.145(2)                                                                       |
| α (deg)                                                  | 90                                                              | 90                                                               | 90                                                               | 90                                                               | 90                                                               | 90                                                               | 90                                                             | 78.963(5)                                                                       |
| β (deg)                                                  | 95.640(5)                                                       | 95.149(5)                                                        | 94.672(5)                                                        | 94.521(5)                                                        | 94.345(5)                                                        | 110.268(5)                                                       | 106.534(4)                                                     | 70.463(5)                                                                       |
| γ (deg)                                                  | 90                                                              | 90                                                               | 90                                                               | 90                                                               | 90                                                               | 90                                                               | 90                                                             | 73.164(5)                                                                       |
| volume (Å <sup>3</sup> )                                 | 3315.6(7)                                                       | 3290.8(5)                                                        | 3260.0(5)                                                        | 3251.7(5)                                                        | 3194.3(5)                                                        | 2556.0(9)                                                        | 2117.6                                                         | 1968.6(5)                                                                       |
| Z                                                        | 4                                                               | 4                                                                | 4                                                                | 4                                                                | 4                                                                | 4                                                                | 4                                                              | 2                                                                               |
| ρ <sub>calc</sub> (g cm <sup>-3</sup> )                  | 1.347                                                           | 1.168                                                            | 1.191                                                            | 1.212                                                            | 1.251                                                            | 1.285                                                            | 1.581                                                          | 1.192                                                                           |
| μ (mm <sup>-1</sup> )                                    | 5.045                                                           | 1.728                                                            | 1.953                                                            | 2.327                                                            | 2.782                                                            | 2.212                                                            | 7.870                                                          | 1.461                                                                           |
| F (000)                                                  | 1340                                                            | 1212                                                             | 1220                                                             | 1232                                                             | 1244                                                             | 1020                                                             | 956                                                            | 742                                                                             |
| θ range (deg)                                            | 25.242                                                          | 25.242                                                           | 25.242                                                           | 25.492                                                           | 25.242                                                           | 25.242                                                           | 25.242                                                         | 25.242                                                                          |
| R (int)                                                  | 0.0499                                                          | 0.0312                                                           | 0.0269                                                           | 0.0172                                                           | 0.0466                                                           | 0.0792                                                           | 0.0649                                                         | 0.0508                                                                          |
| data/restraints/<br>parameters                           | 6743/0/271                                                      | 7257/0/271                                                       | 7102/0/271                                                       | 7741/0/337                                                       | 7824/0/270                                                       | 2621/31/127                                                      | 2159/0/80                                                      | 8057/42/356                                                                     |
| GOF                                                      | 1.031                                                           | 1.070                                                            | 1.040                                                            | 1.075                                                            | 1.042                                                            | 1.013                                                            | 1.032                                                          | 1.094                                                                           |
| R <sub>1</sub> [ <i>I</i> > 2σ( <i>I</i> )] <sup>a</sup> | 0.0263                                                          | 0.0232                                                           | 0.0186                                                           | 0.0147                                                           | 0.0299                                                           | 0.0387                                                           | 0.0335                                                         | 0.0668                                                                          |
| wR <sub>2</sub> (all data) <sup>b</sup>                  | 0.0543                                                          | 0.0486                                                           | 0.0420                                                           | 0.0328                                                           | 0.0647                                                           | 0.0897                                                           | 0.0672                                                         | 0.1774                                                                          |
| largest peak/hole<br>(e <sup>-</sup> ·Å <sup>-3</sup> )  | 0.750/-0.470                                                    | 0.700/-0.304                                                     | 0.429/-0.244                                                     | 0.419/-0.280                                                     | 0.754/-0.443                                                     | 0.774/-0.853                                                     | 0.749/-1.137                                                   | 1.617/-1.784                                                                    |
| temp (K)                                                 | 150(2)                                                          | 180(2)                                                           | 150(2)                                                           | 150(2)                                                           | 150(2)                                                           | 150(2)                                                           | 190(2)                                                         | 150(2)                                                                          |

<sup>a</sup>R<sub>1</sub> =  $\sum |F_o| - |F_c|$  /  $\sum |F_o|$  for reflections with  $F_o^2 > 2\sigma(F_o^2)$ .

<sup>b</sup>wR<sub>2</sub> =  $[\sum w(F_o^2 - F_c^2)^2 / \sum (F_o^2)^2]^{1/2}$  for all reflections.

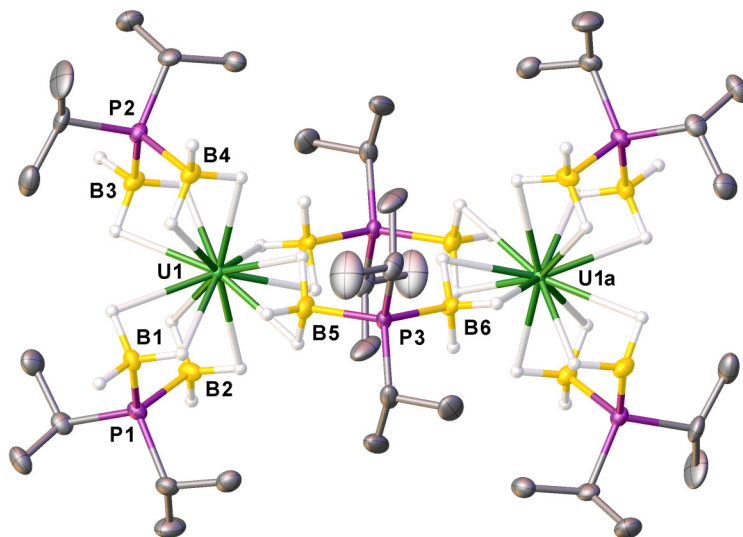

**Figure S1.** Molecular structure of  $U(H_3BP^iPr_2BH_3)_3$  ( $U^iPr$ ) with thermal ellipsoids at 35% probability. Hydrogen atoms attached to carbon were omitted from the figure.

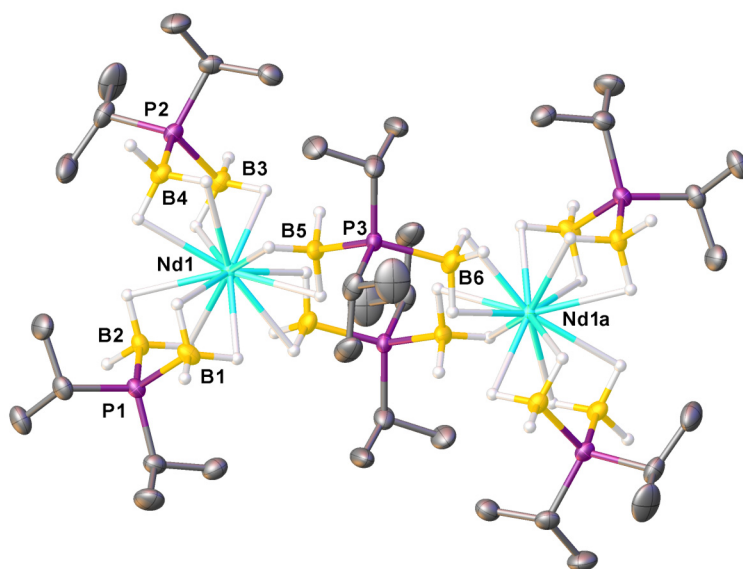

**Figure S2.** Molecular structure of  $Nd(H_3BP^iPr_2BH_3)_3$  ( $Nd^iPr$ ) with thermal ellipsoids at 35% probability. Hydrogen atoms attached to carbon were omitted from the figure.

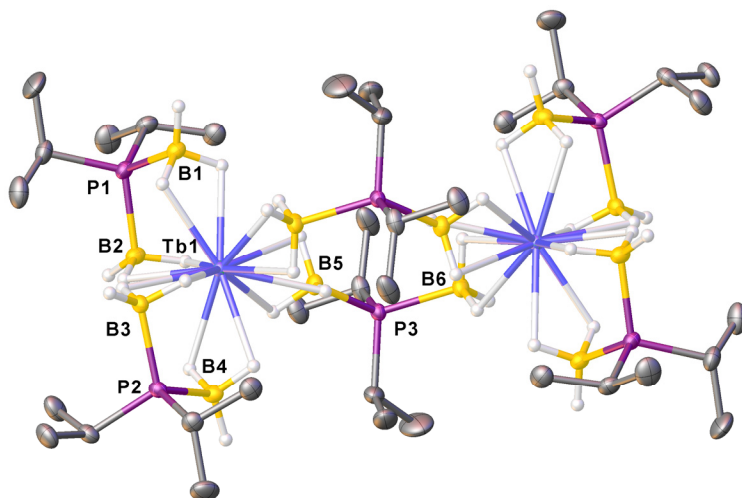

**Figure S3.** Molecular structure of  $\text{Tb}(\text{H}_3\text{BP}^i\text{Pr}_2\text{BH}_3)_3$  (**Tb-*i*Pr**) with thermal ellipsoids at 35% probability. Hydrogen atoms attached to carbon were omitted from the figure.

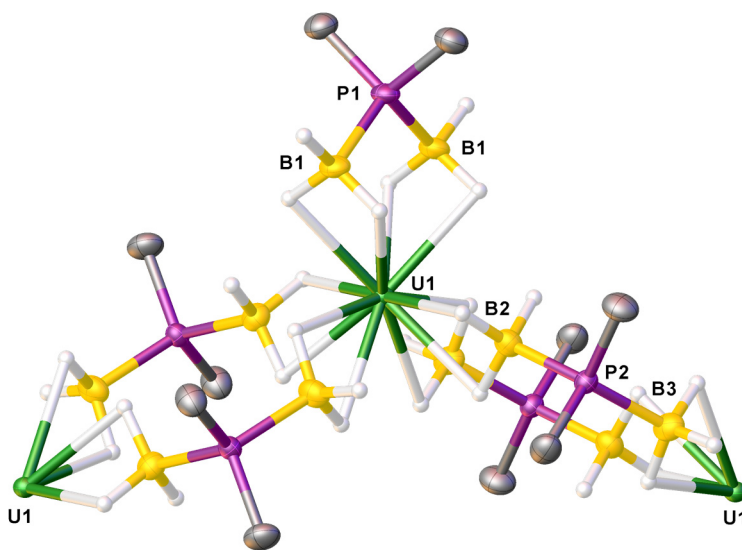

**Figure S4.** Molecular structure of  $\text{U}(\text{H}_3\text{BPMe}_2\text{BH}_3)_3$  (**U-Me**) with thermal ellipsoids at 35% probability. Hydrogen atoms attached to carbon were omitted from the figure.

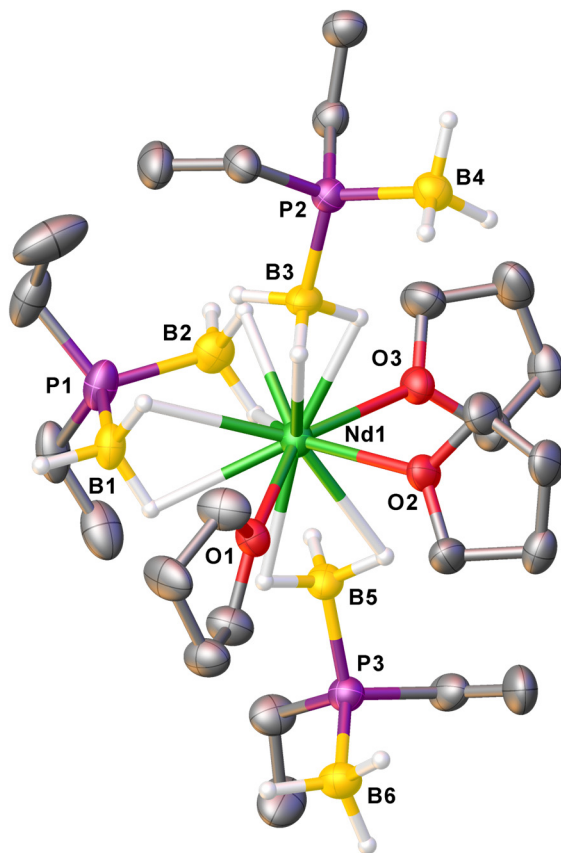

**Figure S5.** Molecular structure of Nd(H<sub>3</sub>BPEt<sub>2</sub>BH<sub>3</sub>)<sub>3</sub>(THF)<sub>3</sub> (**Nd-Et-THF**) with thermal ellipsoids at 35% probability. Hydrogen atoms attached to carbon and a disordered carbon on THF were omitted from the figure.

## II. NMR spectra

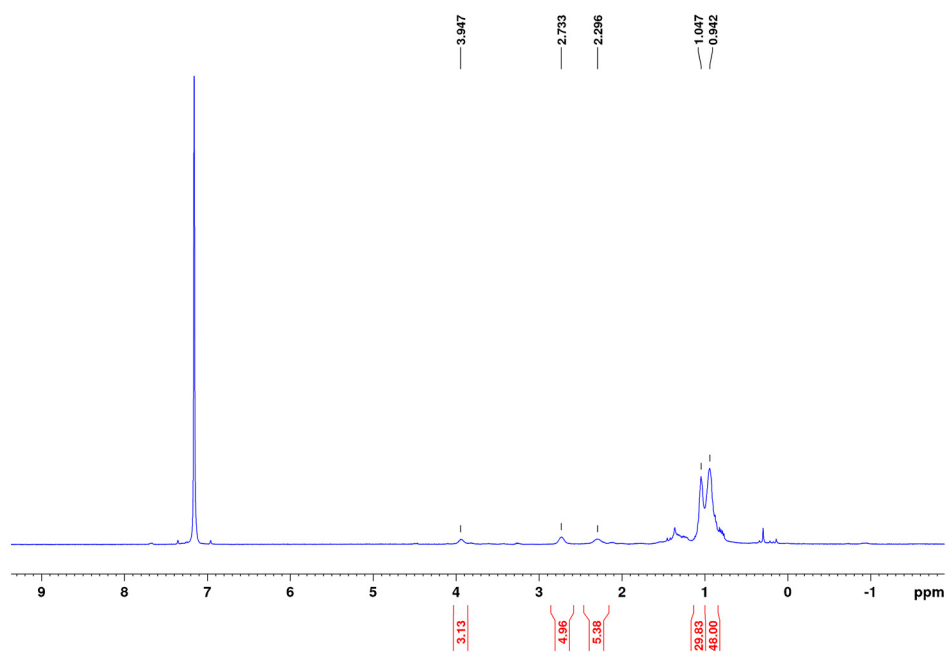

**Figure S6.**  $^1\text{H}$  NMR spectrum of  $\text{U}(\text{H}_3\text{BP}^i\text{Pr}_2\text{Pr}_2\text{BH}_3)_3$  in  $\text{C}_6\text{D}_6$  (isopropyl region).

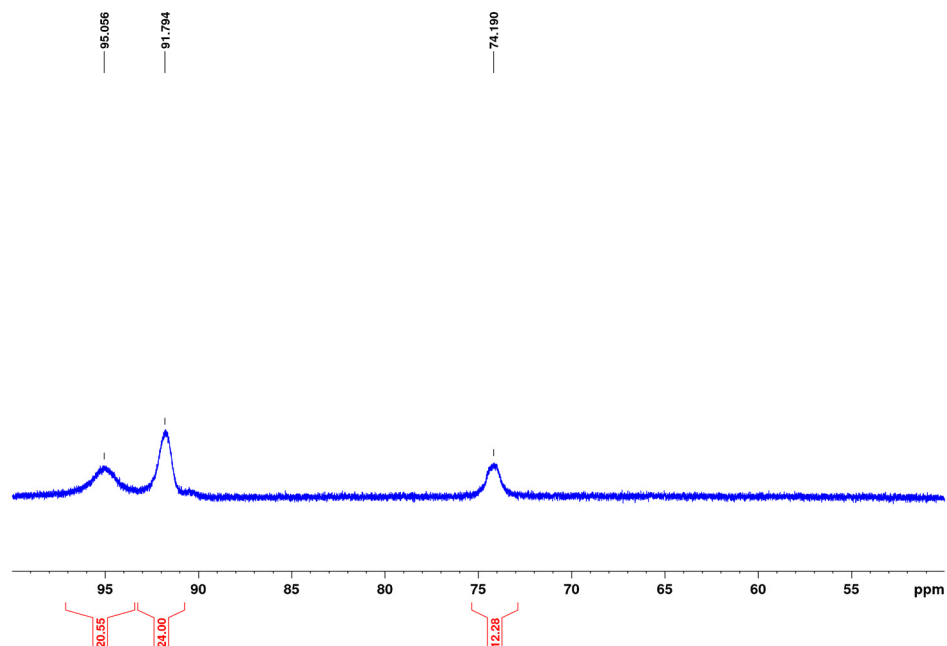

**Figure S7.**  $^1\text{H}$  NMR spectrum of  $\text{U}(\text{H}_3\text{BP}^i\text{Pr}_2\text{Pr}_2\text{BH}_3)_3$  in  $\text{C}_6\text{D}_6$  ( $\text{BH}_3$  region)

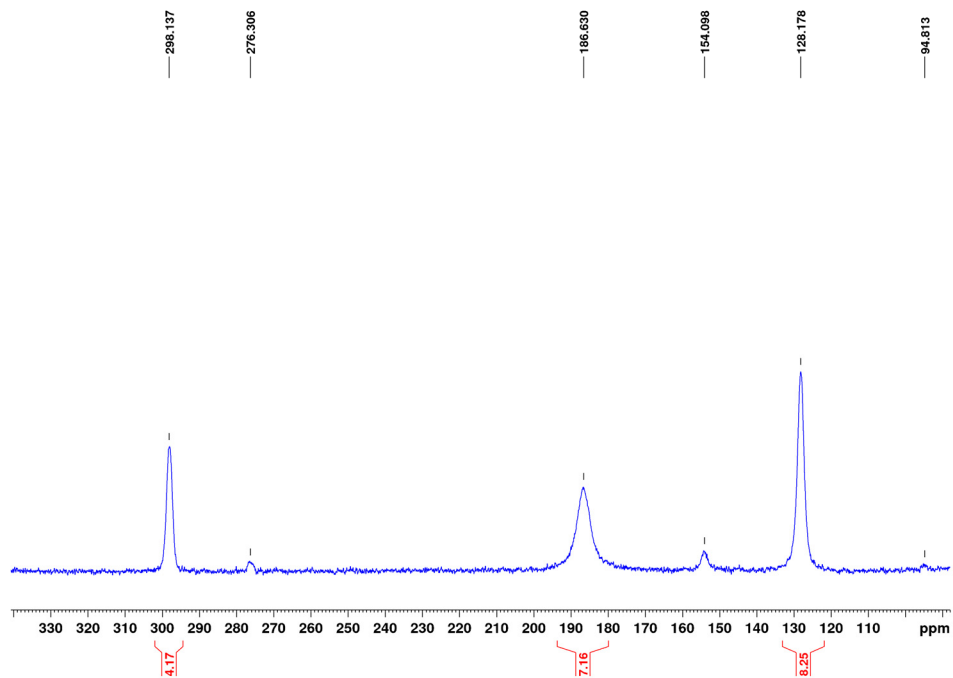

**Figure S8.**  $^{11}\text{B}$  NMR spectrum of  $\text{U}(\text{H}_3\text{BP}^i\text{Pr}_2\text{BH}_3)_3$  in  $\text{C}_6\text{D}_6$ .

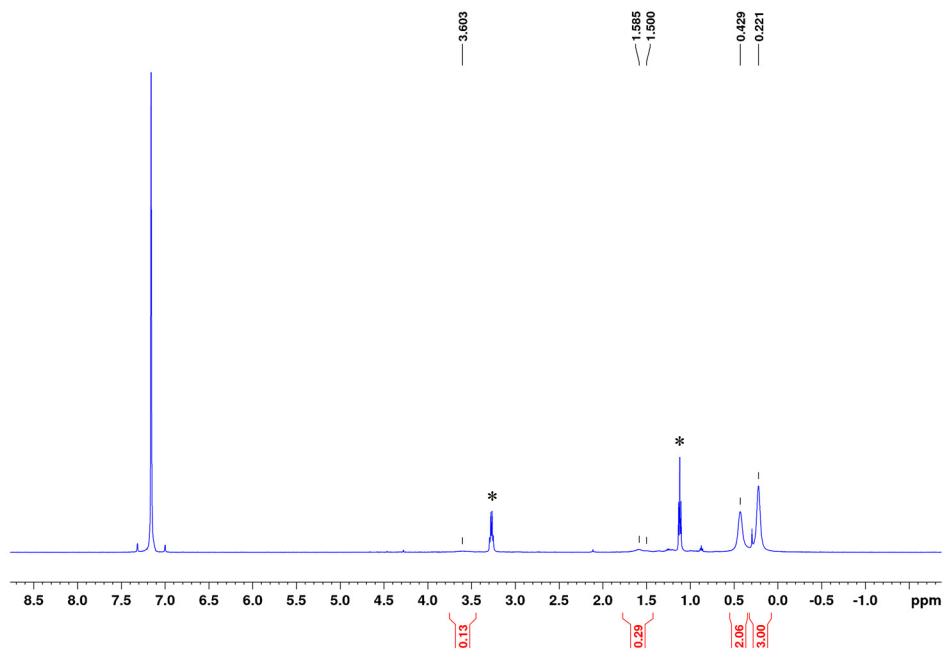

**Figure S9.**  $^1\text{H}$  NMR spectrum of  $\text{U}(\text{H}_3\text{BP}^i\text{Pr}_2\text{BH}_3)_3$  in  $\text{C}_6\text{D}_6$  (ethyl region). The \* indicates resonances associated with residual  $\text{Et}_2\text{O}$ .

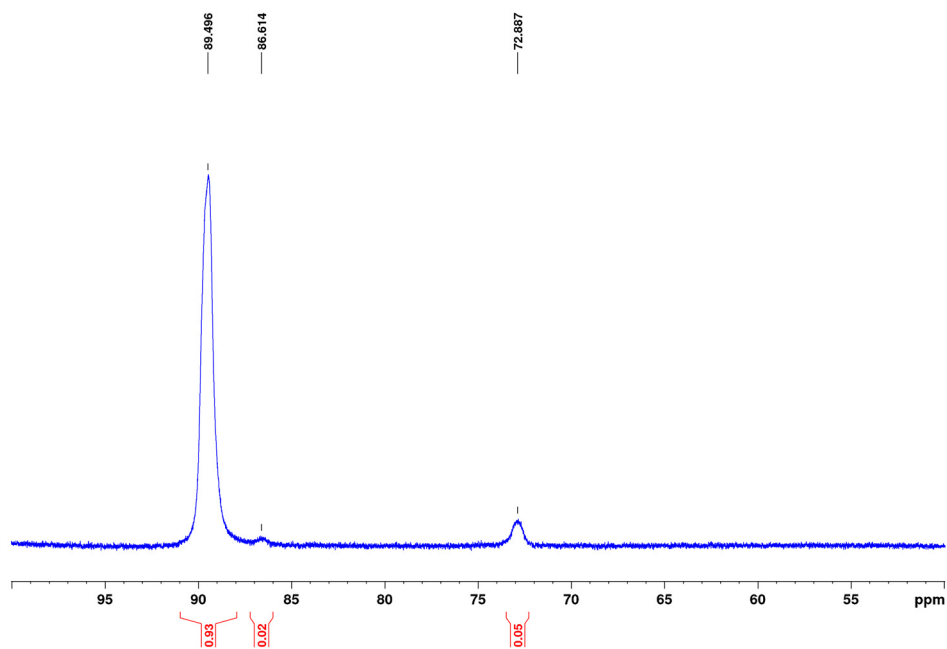

**Figure S10.**  $^1\text{H}$  NMR spectrum of  $\text{U}(\text{H}_3\text{BPEt}_2\text{BH}_3)_3$  in  $\text{C}_6\text{D}_6$  ( $\text{BH}_3$  region).

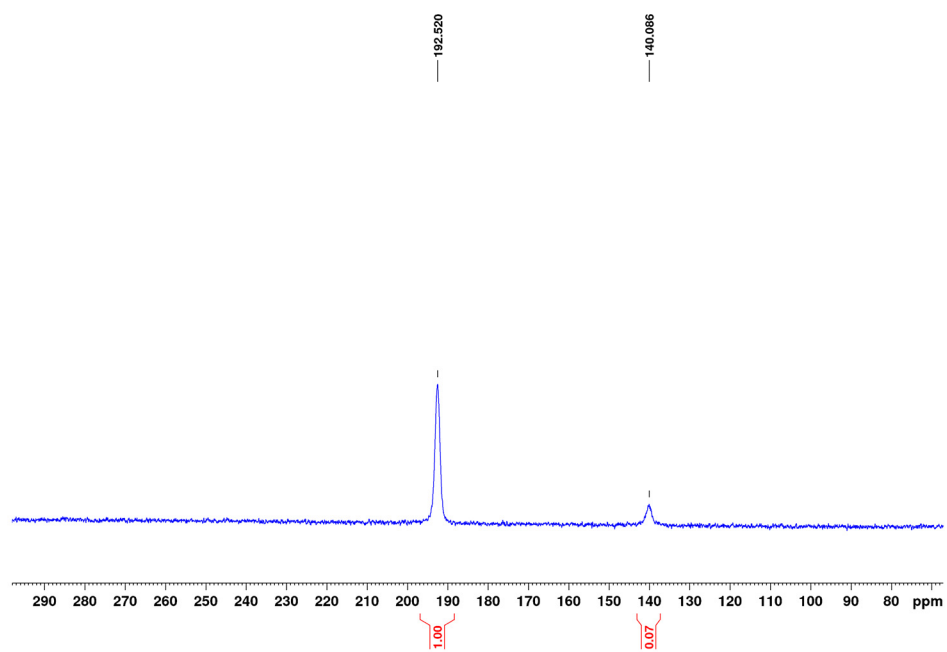

**Figure S11.**  $^{11}\text{B}$  NMR spectrum of  $\text{U}(\text{H}_3\text{BPEt}_2\text{BH}_3)_3$  in  $\text{C}_6\text{D}_6$ .



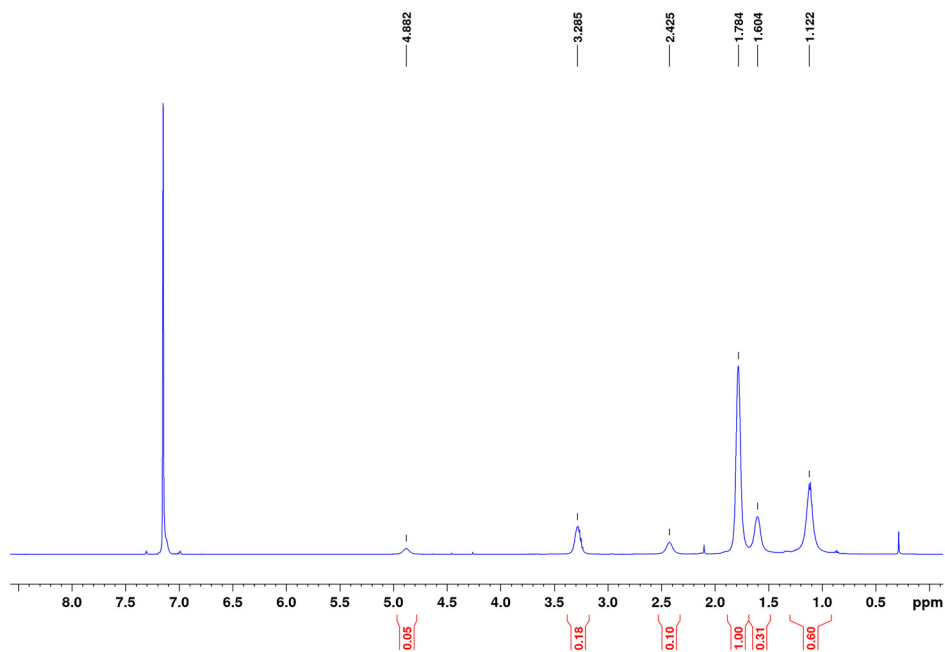

**Figure S12.**  $^1\text{H}$  NMR spectrum of  $\text{Nd}(\text{H}_3\text{BP}^i\text{Pr}_2\text{BH}_3)_3$  in  $\text{C}_6\text{D}_6$  (isopropyl region).

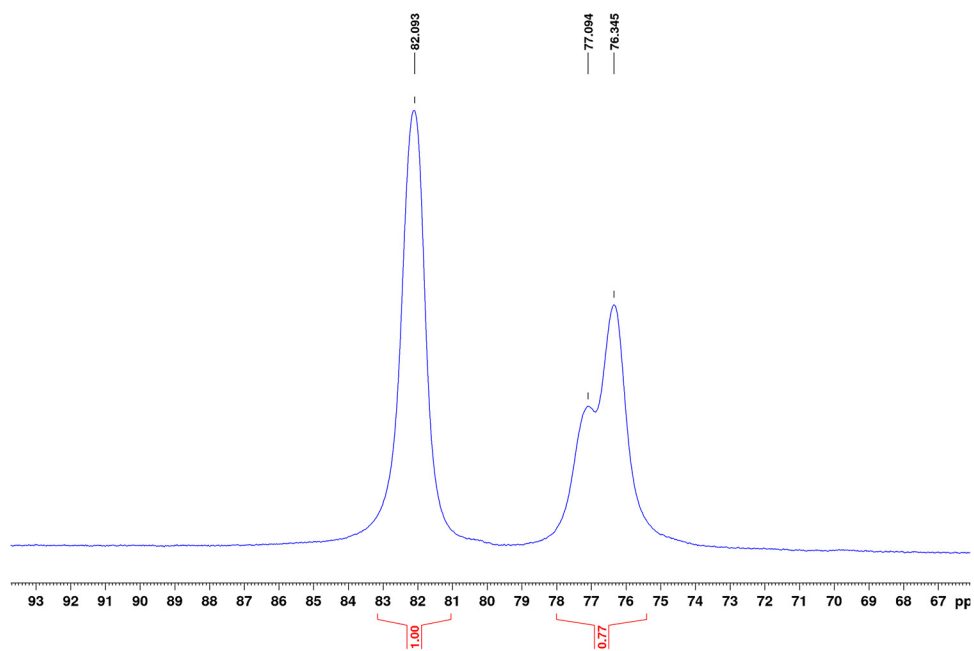

**Figure S12.**  $^1\text{H}$  NMR spectrum of  $\text{Nd}(\text{H}_3\text{BP}^i\text{Pr}_2\text{BH}_3)_3$  in  $\text{C}_6\text{D}_6$  ( $\text{BH}_3$  region).

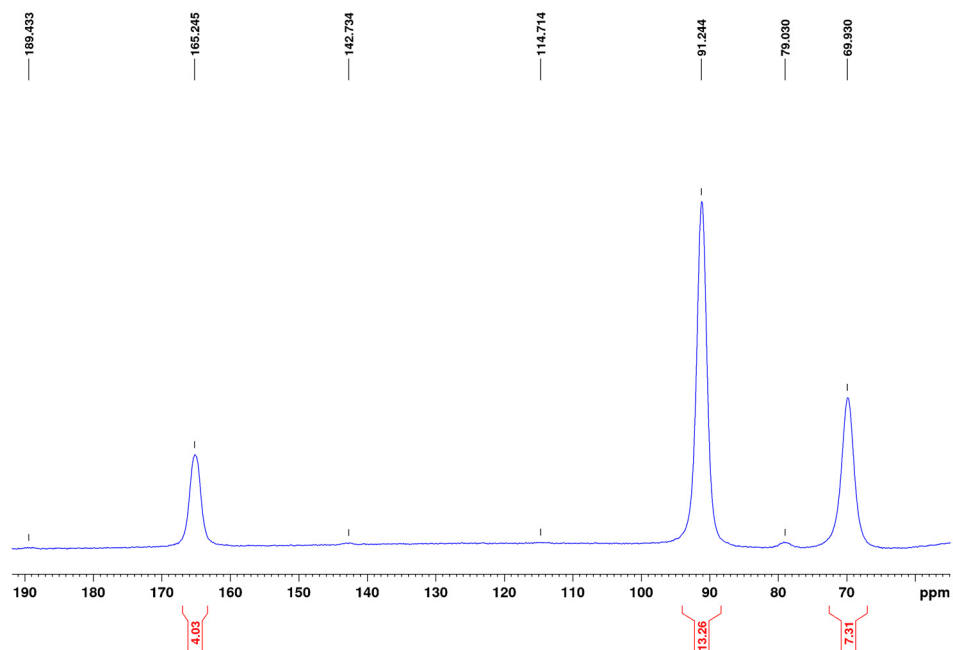

**Figure S13.**  $^{11}\text{B}$  NMR spectrum of  $\text{Nd}(\text{H}_3\text{BP}^i\text{Pr}_2\text{BH}_3)_3$  in  $\text{C}_6\text{D}_6$ .

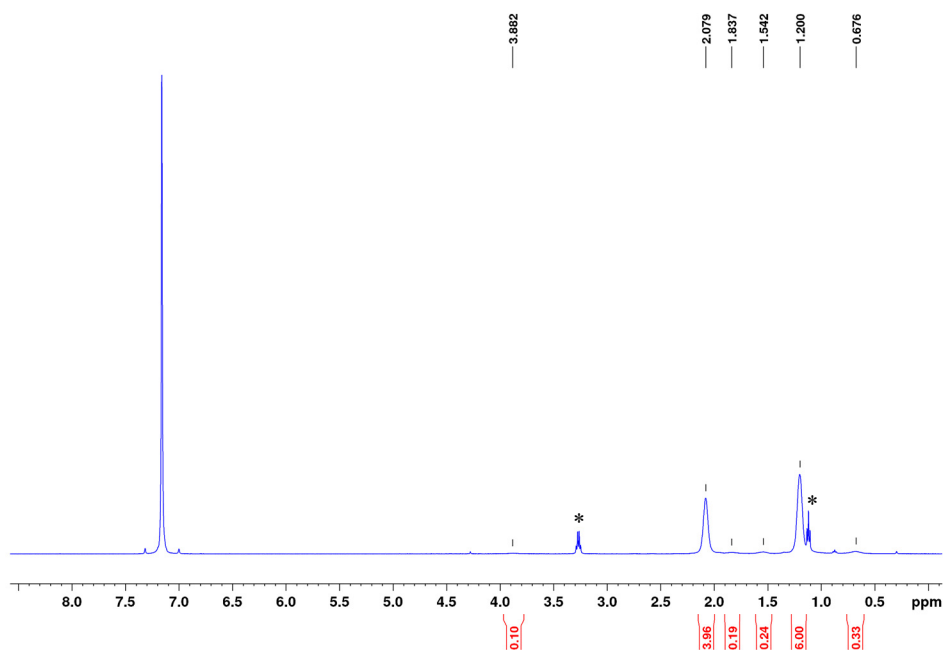

**Figure S14.**  $^1\text{H}$  NMR spectrum of  $\text{Nd}(\text{H}_3\text{BP}^i\text{Pr}_2\text{BH}_3)_3$  in  $\text{C}_6\text{D}_6$  (ethyl region). The \* indicates resonances associated with residual  $\text{Et}_2\text{O}$ .

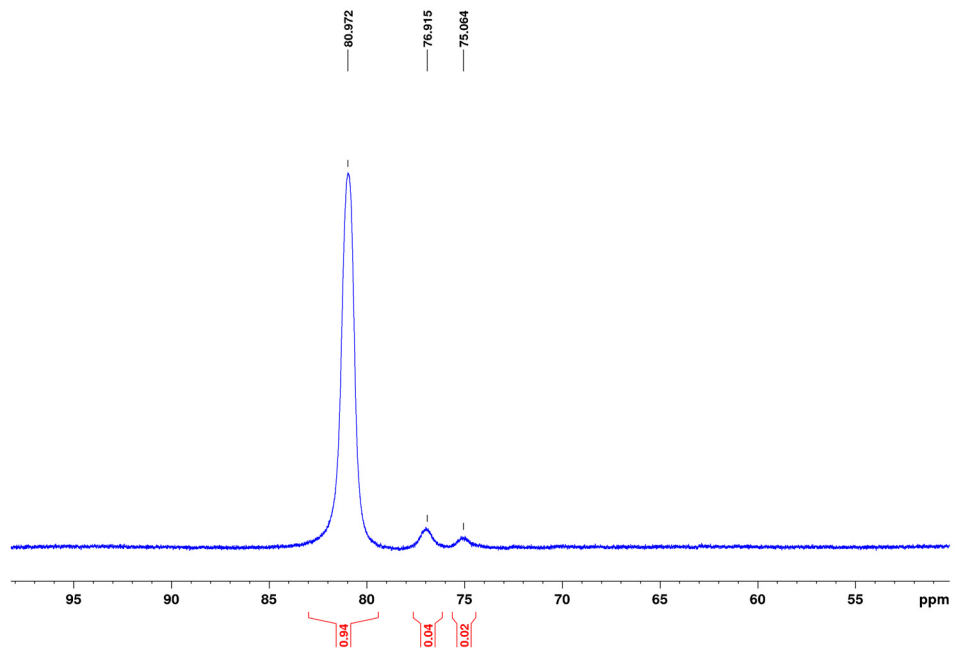

**Figure S15.**  $^1\text{H}$  NMR spectrum of  $\text{Nd}(\text{H}_3\text{BPEt}_2\text{BH}_3)_3$  in  $\text{C}_6\text{D}_6$  ( $\text{BH}_3$  region).

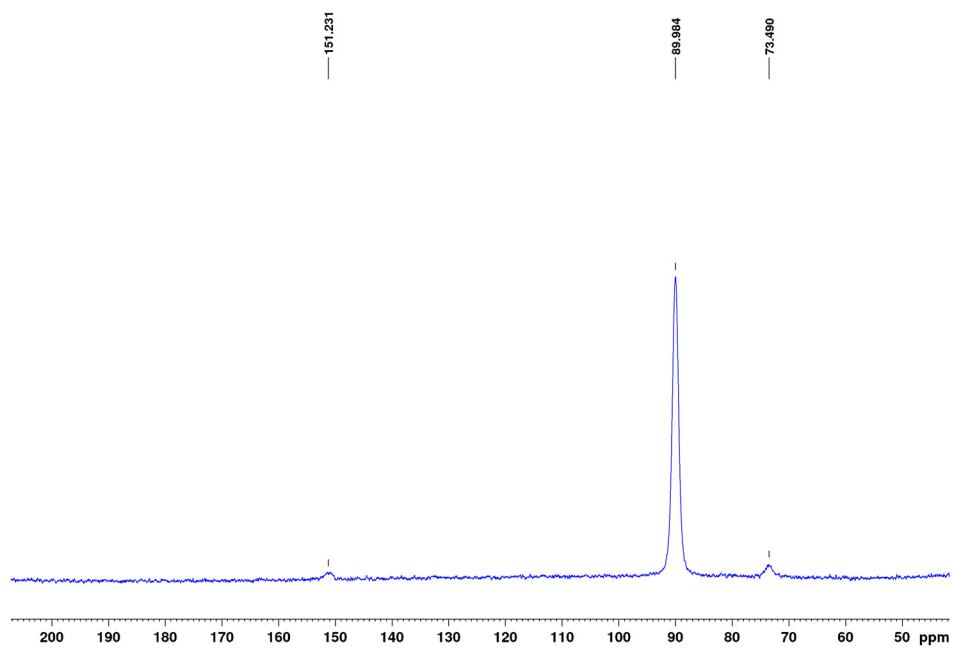

**Figure S16.**  $^{11}\text{B}$  NMR spectrum of  $\text{Nd}(\text{H}_3\text{BPEt}_2\text{BH}_3)_3$  in  $\text{C}_6\text{D}_6$ .

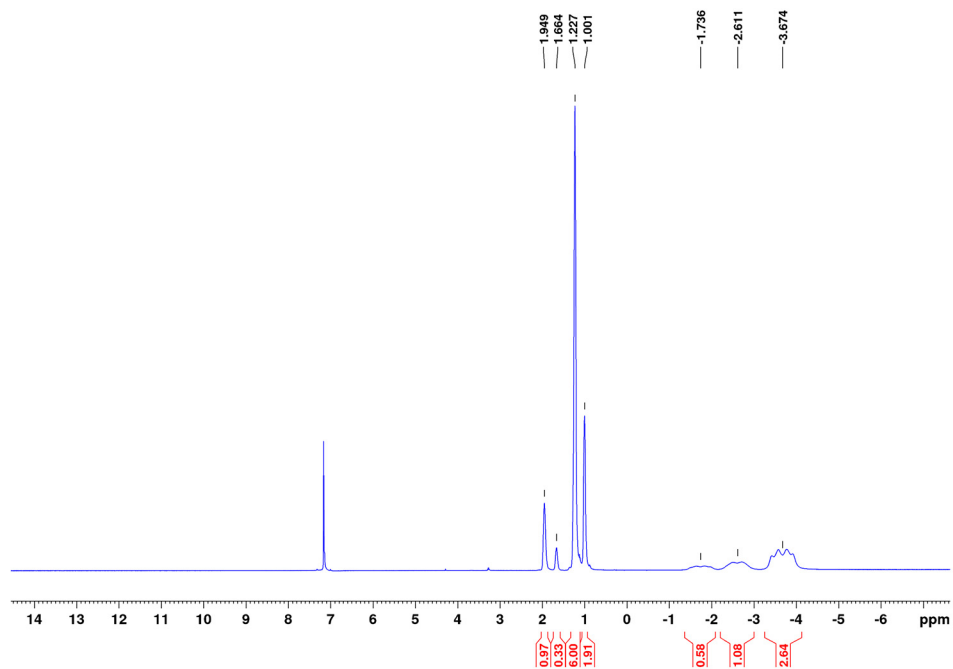

**Figure S17.**  $^1\text{H}$  NMR spectrum of  $\text{Sm}(\text{H}_3\text{BP}'\text{Pr}_2\text{BH}_3)_3$  in  $\text{C}_6\text{D}_6$ .

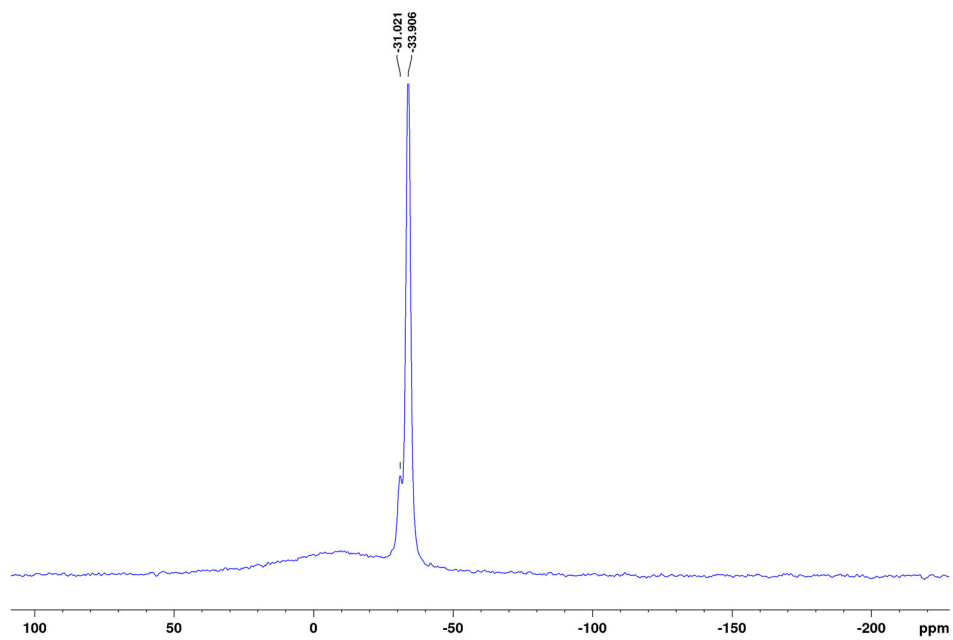

**Figure S18.**  $^{11}\text{B}$  NMR spectrum of  $\text{Sm}(\text{H}_3\text{BP}'\text{Pr}_2\text{BH}_3)_3$  in  $\text{C}_6\text{D}_6$ .

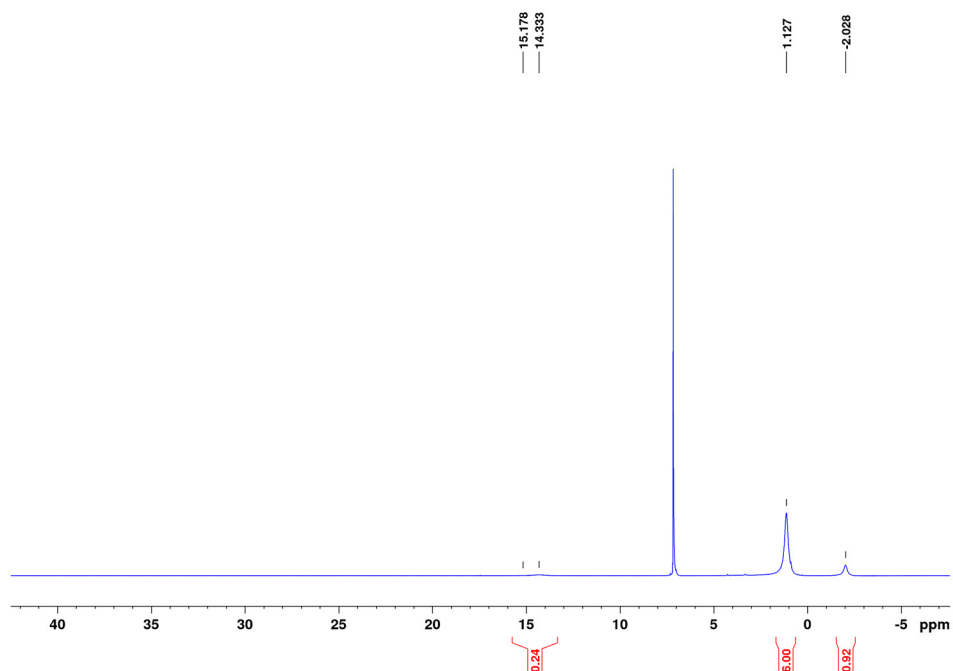

**Figure S19.**  $^1\text{H}$  NMR spectrum of  $\text{Tb}(\text{H}_3\text{BP}^i\text{Pr}_2\text{BH}_3)_3$  in  $\text{C}_6\text{D}_6$  (isopropyl region).

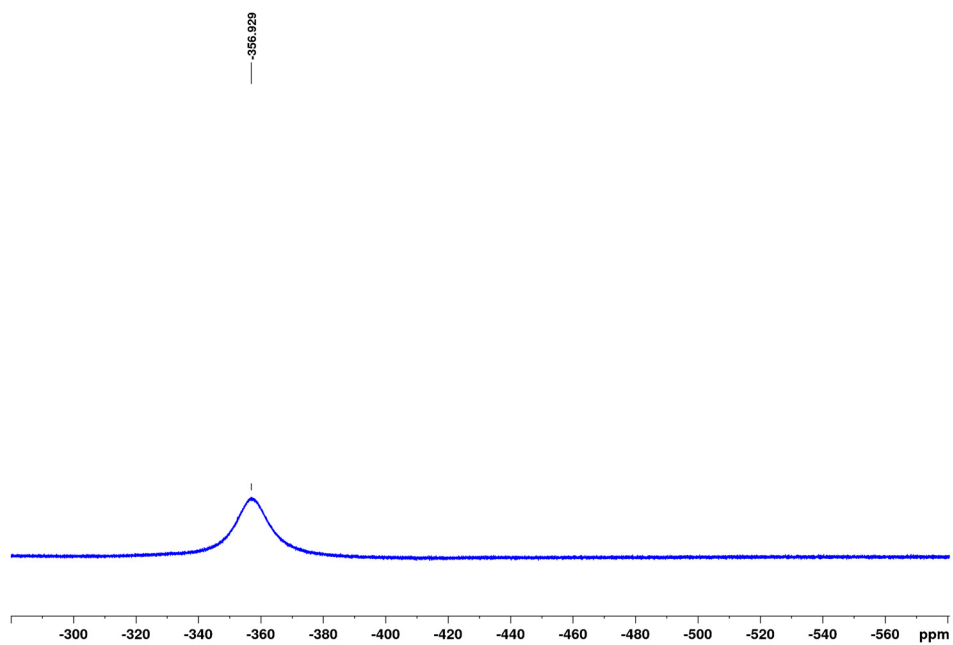

**Figure S20.**  $^1\text{H}$  NMR spectrum of  $\text{Tb}(\text{H}_3\text{BP}^i\text{Pr}_2\text{BH}_3)_3$  in  $\text{C}_6\text{D}_6$  ( $\text{BH}_3$  region).

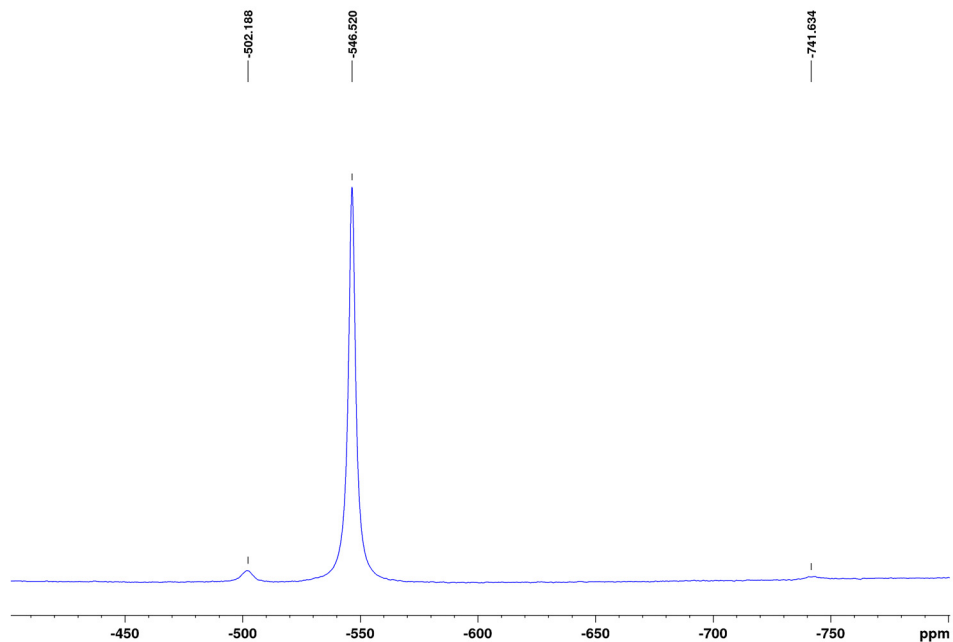

**Figure S21.**  $^{11}\text{B}$  NMR spectrum of  $\text{Tb}(\text{H}_3\text{BP}'\text{Pr}_2\text{BH}_3)_3$  in  $\text{C}_6\text{D}_6$ .

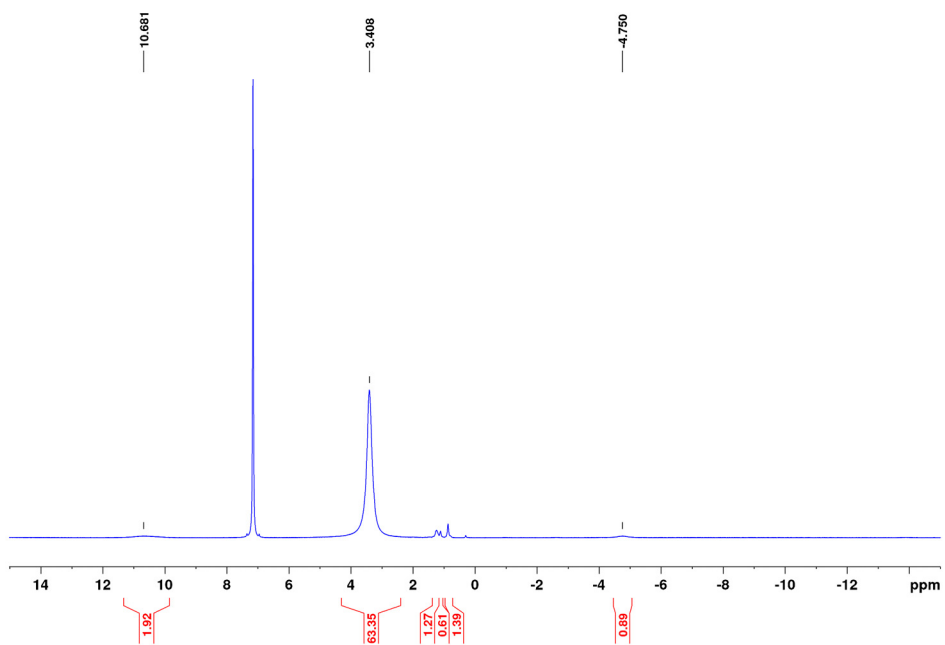

**Figure S22.**  $^1\text{H}$  NMR spectrum of  $\text{Er}(\text{H}_3\text{BP}'\text{Pr}_2\text{BH}_3)_3$  in  $\text{C}_6\text{D}_6$  (isopropyl region).

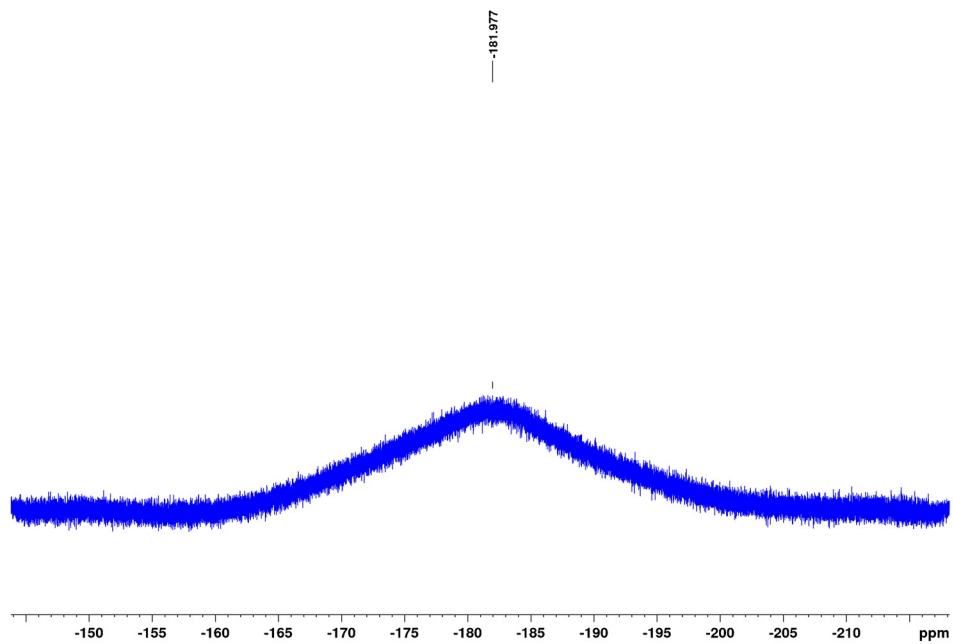

**Figure S23.**  $^1\text{H}$  NMR spectrum of  $\text{Er}(\text{H}_3\text{BP}^i\text{Pr}_2\text{BH}_3)_3$  in  $\text{C}_6\text{D}_6$  ( $\text{BH}_3$  region).

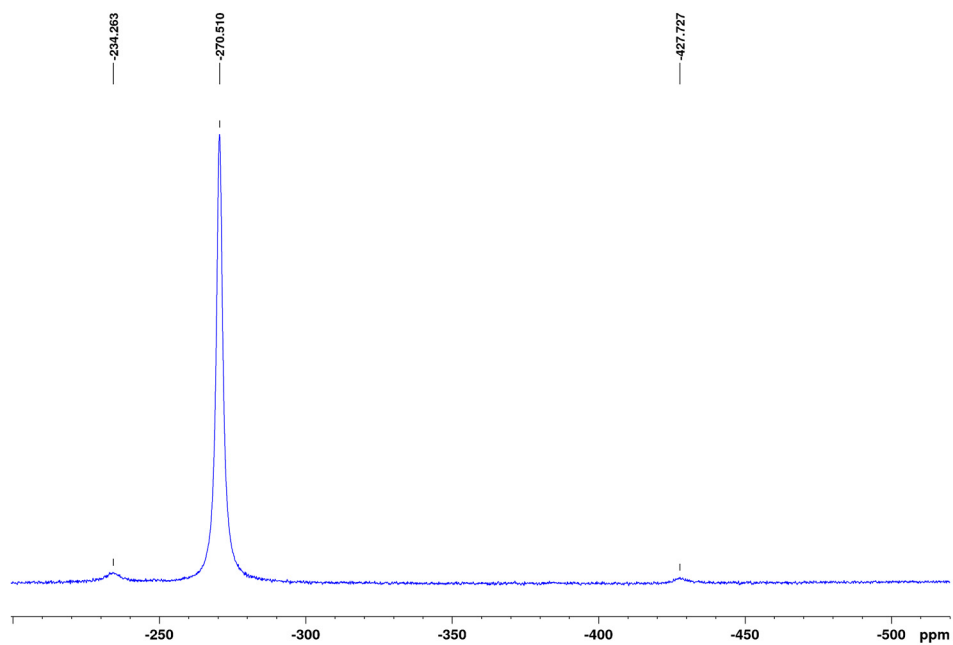

**Figure S24.**  $^{11}\text{B}$  NMR spectrum of  $\text{Er}(\text{H}_3\text{BP}^i\text{Pr}_2\text{BH}_3)_3$  in  $\text{C}_6\text{D}_6$ .

### III. IR spectra

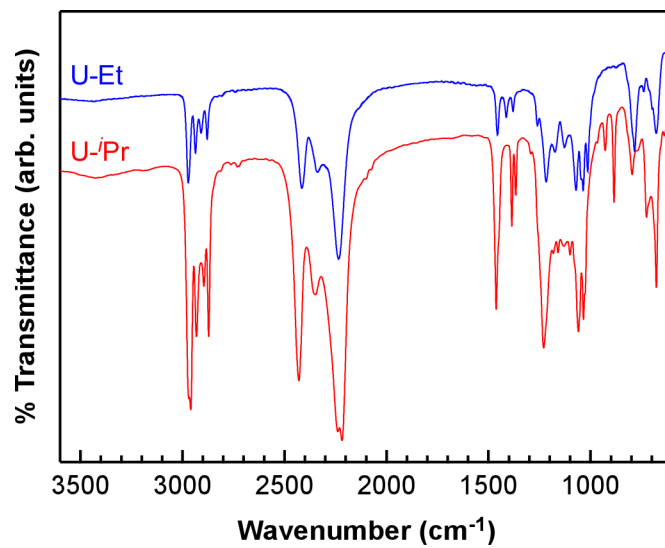

**Figure S25.** KBr IR spectra of  $\text{U}(\text{H}_3\text{BP}^i\text{Pr}_2\text{BH}_3)_3$  (red) and  $\text{U}(\text{H}_3\text{BPEt}_2\text{BH}_3)_3$  (blue).

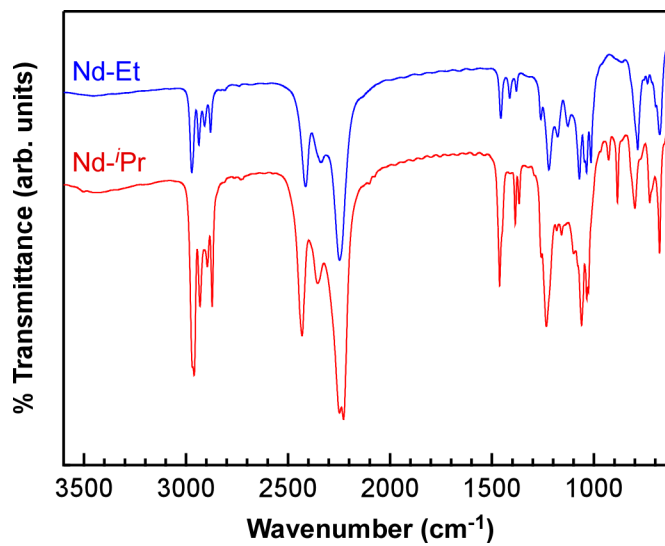

**Figure S26.** KBr IR spectra of  $\text{Nd}(\text{H}_3\text{BP}^i\text{Pr}_2\text{BH}_3)_3$  (red) and  $\text{Nd}(\text{H}_3\text{BPEt}_2\text{BH}_3)_3$  (blue).



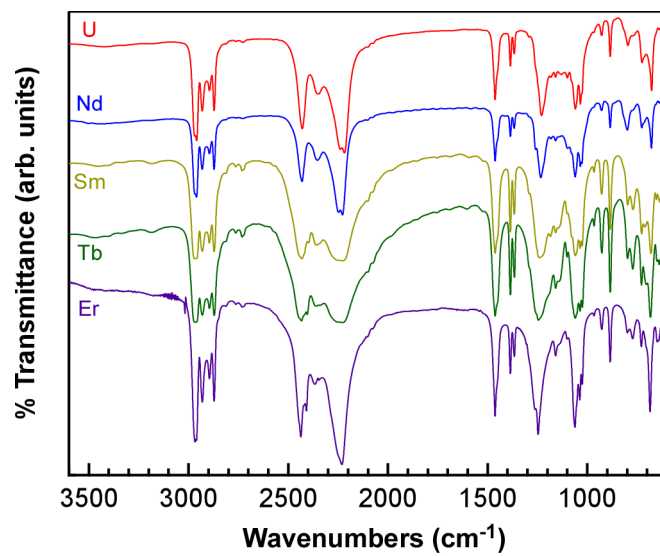

**Figure S27.** KBr IR spectra of  $M(\text{H}_3\text{BP}^i\text{Pr}_2\text{BH}_3)_3$  complexes ( $M = \text{U}, \text{Nd}, \text{Sm}, \text{Tb}, \text{and Er}$ ).

#### IV. DFT data

**Table S2.** Selected bond distances (Å) and ligand B-P-B angles (°) of dimers from the RI-TPSS-D3/def2-TZVP (def-TZVP for U, def2-SV(P) for C) on optimized structures of the dimers.

| Complex              | M-B (Å)<br>Chelating | M-B (Å)<br>Bridging | Chelating<br>Angle | Bridging<br>Angle | $\Delta$ Angle |      |
|----------------------|----------------------|---------------------|--------------------|-------------------|----------------|------|
| <b>Nd-Et (model)</b> | 2.793                | 2.672               | 2.874              | 110.7             | 119.2          | 8.5  |
| <b>Nd-<i>i</i>Pr</b> | 2.801                | 2.630               | 2.865              | 110.1             | 118.7          | 8.6  |
| <b>Nd-Ph</b>         | 2.796                | 2.600               | 2.826              | 111.0             | 117.7          | 6.8  |
| <b>Nd-<i>t</i>Bu</b> | 2.820                | 2.607               | 2.800              | 107.1             | 117.4          | 10.3 |
| <b>U-Et (model)</b>  | 2.787                | 2.685               | 2.900              | 110.9             | 118.6          | 7.6  |
| <b>U-<i>i</i>Pr</b>  | 2.839                | 2.584               | 2.851              | 106.4             | 117.8          | 11.4 |
| <b>U-Ph</b>          | 2.807                | 2.574               | 2.837              | 109.9             | 118.1          | 8.2  |
| <b>U-<i>t</i>Bu</b>  | 2.846                | 2.599               | 2.754              | 104.9             | 113.6          | 8.7  |
| <b>Sm-<i>i</i>Pr</b> | 2.778                | 2.681               | 2.865              | 110.5             | 116.9          | 6.4  |
| <b>Tb-<i>i</i>Pr</b> | 2.773                | 2.593               | 2.788              | 108.3             | 121.5          | 13.1 |
| <b>Er-<i>i</i>Pr</b> | 2.744                | 2.531               | 2.766              | 103.5             | 118.1          | 14.6 |

**Table S3.** Average M-B bond distances (Å) and B-P-B angles (°) from the XRD structures of the dimers.

| Complex              | M-B (Å)<br>Chelating | M-B (Å)<br>Bridging (short) | M-B (Å)<br>Bridging (long) | B-P-B (°)<br>Chelating | B-P-B (°)<br>Bridging |
|----------------------|----------------------|-----------------------------|----------------------------|------------------------|-----------------------|
| <b>Nd-<i>i</i>Pr</b> | 2.872                | 2.656                       | 2.780                      | 107.8                  | 116.7                 |
| <b>Nd-Ph</b>         | 2.900                | 2.666                       | 2.696                      | 106.1                  | 112.3                 |
| <b>Nd-<i>t</i>Bu</b> | 2.886                | 2.666                       | 2.674                      | 105.1                  | 108.4                 |
| <b>U-<i>i</i>Pr</b>  | 2.909                | 2.691                       | 2.771                      | 108.3                  | 114.6                 |
| <b>U-Ph</b>          | 2.925                | 2.683                       | 2.700                      | 105.9                  | 111.9                 |
| <b>U-<i>t</i>Bu</b>  | 2.920                | 2.690                       | 2.694                      | 106.6                  | 108.3                 |
| <b>Sm-<i>i</i>Pr</b> | 2.844                | 2.625                       | 2.813                      | 106.9                  | 118.7                 |
| <b>Tb-<i>i</i>Pr</b> | 2.817                | 2.598                       | 2.796                      | 105.5                  | 119.6                 |
| <b>Er-<i>i</i>Pr</b> | 2.782                | 2.565                       | 2.757                      | 104.3                  | 120.8                 |

**Table S4.** The TPSS-D3 geometry parameters and Gibbs free energy calculation with two different basis sets. In the mixed basis set def2-SV(P) is used for light atoms while def2-TZVP is used for Nd. In all calculations, def-TZVP was used on U. A single point calculation was performed on the geometry resulting from the mixed basis set with the larger basis set. The  $\Delta G$  with the single-point corrected energy is reported in parentheses.

|                   | <b>Nd-<sup>t</sup>Bu</b> |           | <b>U-<sup>t</sup>Bu</b> |           |
|-------------------|--------------------------|-----------|-------------------------|-----------|
|                   | Mixed                    | def2-TZVP | Mixed                   | def2-TZVP |
| M-B (chelating)   | 2.820                    | 2.822     | 2.846                   | 2.862     |
| M-B (bridging)    | 2.703                    | 2.696     | 2.677                   | 2.617     |
| B-P-B (chelating) | 107.1                    | 107.2     | 104.9                   | 103.7     |
| B-P-B (bridging)  | 117.4                    | 116.3     | 113.6                   | 108.3     |
| $\Delta G$        | 6.6 (3.9)                | 3.6       | 7.1 (6.3)               | 6.3       |

**Table S5.** Selected bond distances (Å) angles (°) of monomer from the RI-TPSS-D3/def2-TZVP (def-TZVP for U, def2-SV(P) for C) on optimized structures of the monomer.

| Complex                  | M-B (Å)   | B-P-B (°) |
|--------------------------|-----------|-----------|
|                          | Chelating | chelating |
| <b>Nd-Et</b>             | 2.770     | 112.9     |
| <b>Nd-<sup>i</sup>Pr</b> | 2.773     | 112.4     |
| <b>Nd-Ph</b>             | 2.760     | 113.0     |
| <b>Nd-<sup>t</sup>Bu</b> | 2.793     | 108.2     |
| <b>U-Et</b>              | 2.766     | 114.8     |
| <b>U-<sup>i</sup>Pr</b>  | 2.794     | 111.0     |
| <b>U-Ph</b>              | 2.752     | 114.6     |
| <b>U-<sup>t</sup>Bu</b>  | 2.813     | 106.8     |
| <b>Sm-<sup>i</sup>Pr</b> | 2.759     | 112.3     |
| <b>Tb-<sup>i</sup>Pr</b> | 2.741     | 110.2     |
| <b>Er-<sup>i</sup>Pr</b> | 2.708     | 106.5     |

**Table S6.** The relative energy in kcal/mol structures optimized in DFT from lowest conformer from CREST and X-ray structure.

|                      | From CREST | From XRD      |
|----------------------|------------|---------------|
| <b>Nd-Et (model)</b> | 0.0        | Not available |
| <b>Nd-<i>i</i>Pr</b> | 0.0        | 1.8           |
| <b>Nd-Ph</b>         | 2.3        | 0.0           |
| <b>Nd-<i>t</i>Bu</b> | 5.9        | 0.0           |

**Table S7.** The thermochemical data at 298.15 K for the TPSS-D3 electronic energies, enthalpies, entropies, and free energies for reaction Dimer  $\rightarrow$  2 Monomer. Free energies have been computed assuming a concentration of 1 M for all species and benzene as the solvent.

| <b>Complex</b>       | $\Delta E$<br>kcal·mol <sup>-1</sup> | $\Delta G$<br>kcal·mol <sup>-1</sup> | $\Delta H$<br>kcal·mol <sup>-1</sup> | $\Delta S$<br>kcal·mol <sup>-1</sup> ·K <sup>-1</sup> |
|----------------------|--------------------------------------|--------------------------------------|--------------------------------------|-------------------------------------------------------|
| <b>U-Ph</b>          | 27.0                                 | 9.2                                  | 24.8                                 | 0.059                                                 |
| <b>Nd-Ph</b>         | 26.2                                 | 8.7                                  | 24.1                                 | 0.058                                                 |
| <b>U-<i>i</i>Pr</b>  | 25.6                                 | 8.7                                  | 23.6                                 | 0.057                                                 |
| <b>U-<i>t</i>Bu</b>  | 24.1                                 | 7.1                                  | 22.0                                 | 0.057                                                 |
| <b>Nd-<i>t</i>Bu</b> | 22.3                                 | 6.5                                  | 20.7                                 | 0.054                                                 |
| <b>U-Et</b>          | 20.5                                 | 3.8                                  | 18.5                                 | 0.056                                                 |
| <b>Nd-<i>i</i>Pr</b> | 19.9                                 | 3.6                                  | 18.1                                 | 0.055                                                 |
| <b>Sm-<i>i</i>Pr</b> | 20.4                                 | 3.5                                  | 18.3                                 | 0.056                                                 |
| <b>Nd-Et</b>         | 17.9                                 | 1.8                                  | 16.0                                 | 0.054                                                 |
| <b>Er-<i>i</i>Pr</b> | 18.2                                 | 1.0                                  | 15.7                                 | 0.056                                                 |
| <b>Tb-<i>i</i>Pr</b> | 17.4                                 | -0.2                                 | 14.6                                 | 0.056                                                 |

**Details on the calculated structures of tetramers Nd-*i*Pr-4 and Nd-Et-4.** In the polymeric **Nd-Et** solid-state structure, all chelating Nd-B distances are relatively uniform. However, in the DFT optimized structures of the tetramer, the distances are slightly asymmetric (Table S8). The average Nd-B distance including all metal centers is 2.827 Å in the tetramer, while the distance is 2.933 Å in the solid. However, the two Nd centers in the middle of the tetramer are in an environment more similar to the solid than those at the end of the chain. If the average Nd-B distance is taken only for these groups, a value of 2.889 Å is obtained in better agreement with experiment. The bridging Nd-B distances result in one shorter and one longer bond distance (Table S9), consistent with experiment. The shorter Nd-B distance is 2.656 Å, a difference from experiment of -0.045 Å, and the longer Nd-B distances is 2.833, a difference from experiment of -0.037 Å. Moreover, the average chelating B-P-B angles are also in good agreement with experiment (Table S10). Specifically, the B-P-B angle associated with the two Nd centers in the middle of the chain is 105.7°. Likewise, the bridging B-P-B angle are in good agreement with experiment ranging from 113.4 to 121.7°, compared to an average value of 120.6° in experiment. The oligomers based on a hypothetical **Nd-*i*Pr** polymeric structure also showed similar patterns in Nd-B distances and B-P-B angles (Tables S12-S15).

**Table S8.** Chelating Nd-B distances (Å) in the tetramer **Nd-Et-4** optimized with TPSS-D3/def2-SV(P) (def2-TZVP for Nd). Atom labels correspond to those in Figure S31.

| <b>Bonds<br/>(side)</b> | <b>Distance</b> | <b>Bonds<br/>(side)</b> | <b>Distance</b> |
|-------------------------|-----------------|-------------------------|-----------------|
| Nd2-B124                | 2.81999         | Nd1-B178                | 2.89388         |
| Nd2-B153                | 2.78674         | Nd1-B182                | 2.88325         |
| Nd2-B183                | 2.84839         | Nd4-B181                | 2.88771         |
| Nd2-B179                | 2.79103         | Nd4-B185                | 2.89211         |
| Nd3-B213                | 2.80095         |                         |                 |
| Nd3-B150                | 2.78557         |                         |                 |
| Nd3-B180                | 2.74362         |                         |                 |
| Nd3-B184                | 2.79605         |                         |                 |
| <b>Avg.</b>             | <b>2.797</b>    | <b>Avg.</b>             | <b>2.889</b>    |

**Table S9.** Bridging Nd-B distances (Å) in the tetramer **Nd-Et-4** complexes optimized with TPSS-D3/def2-SV(P) (def2-TZVP for Nd). Atom labels correspond to those in Figure S31.

| <b>Bonds<br/>(longer)</b> | <b>Distance</b> | <b>Bonds<br/>(shorter)</b> | <b>Distance</b> |
|---------------------------|-----------------|----------------------------|-----------------|
| Nd2-B149                  | 2.88286         | Nd2-B119                   | 2.61362         |
| Nd4-B147                  | 2.87026         | Nd4-B121                   | 2.65504         |
| Nd4-B151                  | 2.74031         | Nd4-B123                   | 2.67622         |
| Nd1-B152                  | 2.73107         | Nd1-B122                   | 2.72491         |
| Nd1-B148                  | 2.86667         | Nd1-B118                   | 2.63549         |
| Nd3-B146                  | 2.9065          | Nd3-B120                   | 2.63283         |
| <b>Avg.</b>               | <b>2.833</b>    | <b>Avg.</b>                | <b>2.656</b>    |

**Table S10.** Chelating B-P-B angles ( $^{\circ}$ ) in the tetramer **Nd-Et-4** complex optimized with TPSS-D3/def2-SV(P) (def2-TZVP for Nd). Atom labels correspond to those in Figure S31.

| <b>B-P-B Angle<br/>(side)</b> |              | <b>B-P-B Angle<br/>(middle)</b> |              |
|-------------------------------|--------------|---------------------------------|--------------|
| B124-P12-B153                 | 110.95265    | B181-P211-B185                  | 105.93152    |
| B183-P209-B179                | 111.24925    | B182-P208-B178                  | 105.47814    |
| B150-P9-B213                  | 112.91636    |                                 |              |
| B180-P210-B184                | 114.59284    |                                 |              |
| <b>Avg.</b>                   | <b>112.4</b> | <b>Avg.</b>                     | <b>105.7</b> |

**Table S11.** Bridging B-P-B angles ( $^{\circ}$ ) in the hypothetical tetramer **Nd-Pr-4** optimized with TPSS-D3/def2-SV(P) (def2-TZVP for Nd). Atom labels correspond to those in Figure S32.

| <b>B-P-B Angle</b> |              |
|--------------------|--------------|
| B119-P6-B147       | 116.11358    |
| B149-P8-B121       | 121.73212    |
| B118-P5-B146       | 122.4155     |
| B148-P7-B120       | 115.91117    |
| B151-P10-B122      | 113.41529    |
| B123-P11-B152      | 114.3501     |
| <b>Avg.</b>        | <b>117.3</b> |

**Table S12.** Chelating Nd-B distances ( $\text{\AA}$ ) in the hypothetical tetramer **Nd-Pr-4** optimized with TPSS-D3/def2-SV(P) (def2-TZVP for Nd). Atom labels correspond to those in Figure S32.

| <b>Bonds<br/>(side)</b> | <b>Distance</b> | <b>Bonds<br/>(middle)</b> | <b>Distance</b> |
|-------------------------|-----------------|---------------------------|-----------------|
| Nd2-B125                | 2.82551         | Nd4-127                   | 2.83291         |
| Nd2-B129                | 2.80976         | Nd4-131                   | 2.8557          |
| Nd3-B126                | 2.7956          | Nd1-124                   | 2.87859         |
| Nd3-B130                | 2.78301         | Nd1-128                   | 2.87822         |
| <b>Avg.</b>             | <b>2.803</b>    | <b>Avg.</b>               | <b>2.861</b>    |

**Table S13.** Bridging Nd-B distances (Å) in the hypothetical tetramer **Nd-<sup>i</sup>Pr-4** optimized with TPSS-D3/def2-SV(P) (def2-TZVP for Nd). Atom labels correspond to those in Figure S32.

| <b>Bonds<br/>(longer)</b> | <b>Distance</b> | <b>Bonds<br/>(shorter)</b> | <b>Distance</b> |
|---------------------------|-----------------|----------------------------|-----------------|
| Nd2-B101                  | 2.81167         | Nd2-B67                    | 2.56934         |
| Nd4-B99                   | 2.82057         | Nd4-B69                    | 2.78951         |
| Nd4-B102                  | 2.83362         | Nd4-B73                    | 2.70137         |
| Nd1-B104                  | 2.85044         | Nd1-B70                    | 2.66462         |
| Nd1-B100                  | 2.84588         | Nd1-B66                    | 2.6311          |
| Nd3-B98                   | 2.79318         | Nd3-B68                    | 2.55221         |
| <b>Avg.</b>               | <b>2.826</b>    | <b>Avg.</b>                | <b>2.651</b>    |

**Table S14.** Chelating B-P-B angles (°) in the tetramer **Nd-<sup>i</sup>Pr-4** optimized with TPSS-D3/def2-SV(P) (def2-TZVP for Nd). Atom labels correspond to those in Figure S32.

| <b>B-P-B Angle<br/>(side)</b> |              | <b>B-P-B Angle<br/>(middle)</b> |              |
|-------------------------------|--------------|---------------------------------|--------------|
| P125-B155-P129                | 109.32288    | P127-B157-P131                  | 107.14259    |
| P126-B156-P130                | 111.52806    | P124-B154-P128                  | 105.9125     |
| <b>Avg.</b>                   | <b>110.4</b> | <b>Avg.</b>                     | <b>106.5</b> |

**Table S15.** Bridging B-P-B angles (°) in the tetramer **Nd-<sup>i</sup>Pr-4** optimized with TPSS-D3/def2-SV(P) (Def2-TZVP for Nd). Atom labels correspond to those in Figure S32.

| <b>B-P-B Angle</b> |              |
|--------------------|--------------|
| P67-B6-P99         | 118.14114    |
| P69-B8-P101        | 116.61705    |
| P73-B11-P104       | 119.4401     |
| P70-B9-P102        | 121.32083    |
| P68-B7-P100        | 120.32132    |
| P66-B5-P98         | 118.37801    |
| <b>Avg.</b>        | <b>119.0</b> |



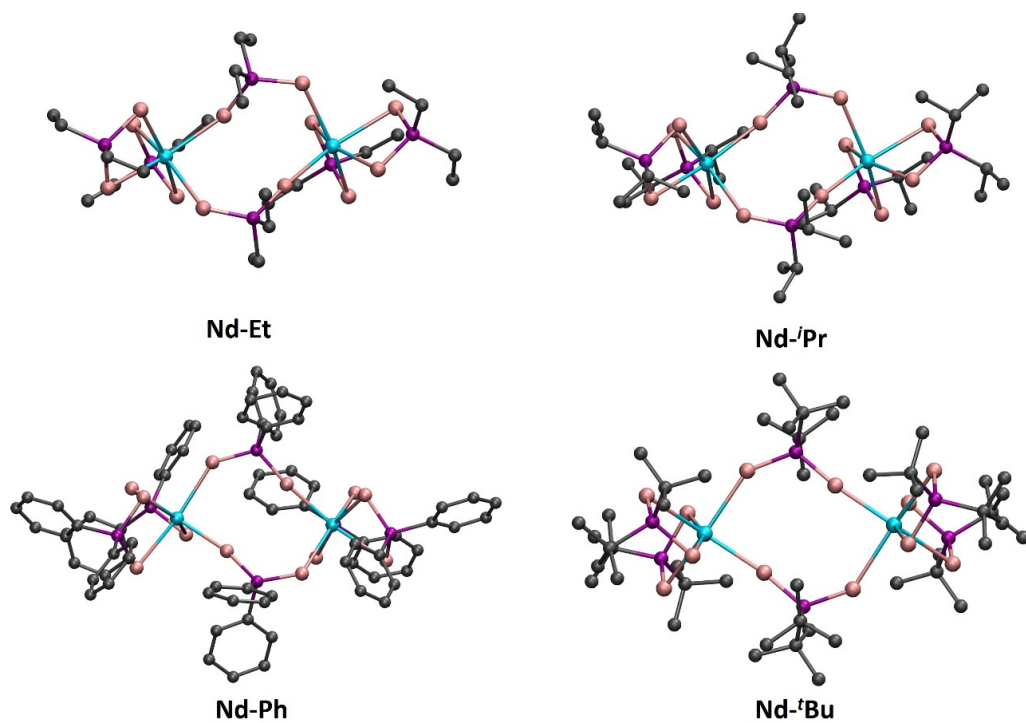

**Figure S28.** DFT optimized structure of **Nd-Et (model)**, **Nd-*i*Pr**, **Nd-Ph**, and **Nd-*t*Bu** complexes. Atoms are color coded as follows: Nd (cyan), B (pink), P (purple), carbon (gray). Hydrogen atoms are omitted for clarity.

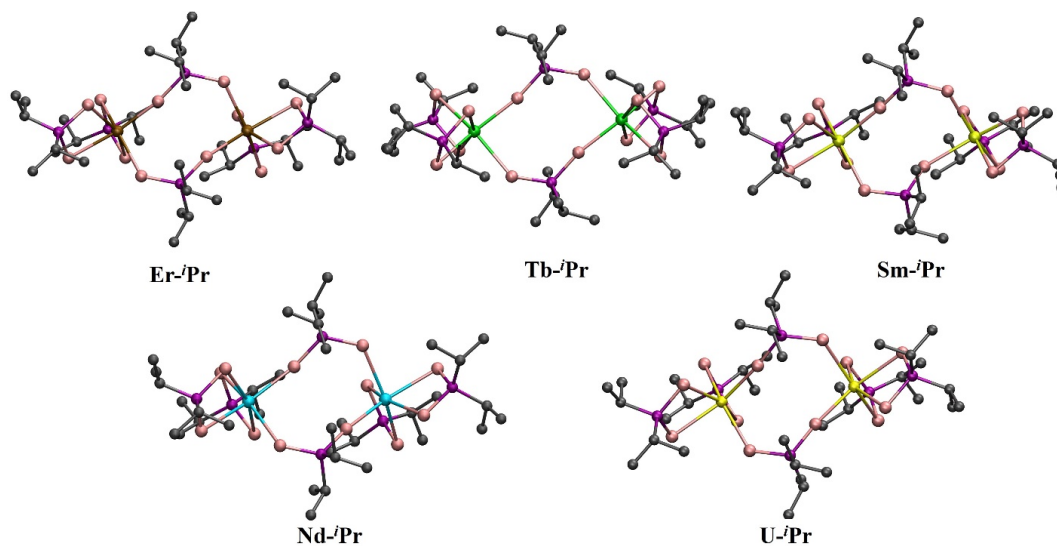

**Figure S29.** DFT optimized structures of **Er-*i*Pr**, **Tb-*i*Pr**, **Sm-*i*Pr**, **Nd-*i*Pr**, and **U-*i*Pr** complexes. Atoms are color coded as follows: Er (brown), Tb (green), Sm (light yellow), Nd (cyan), U (yellow), B (pink), P (purple), carbon (gray). Hydrogen atoms are omitted for clarity.

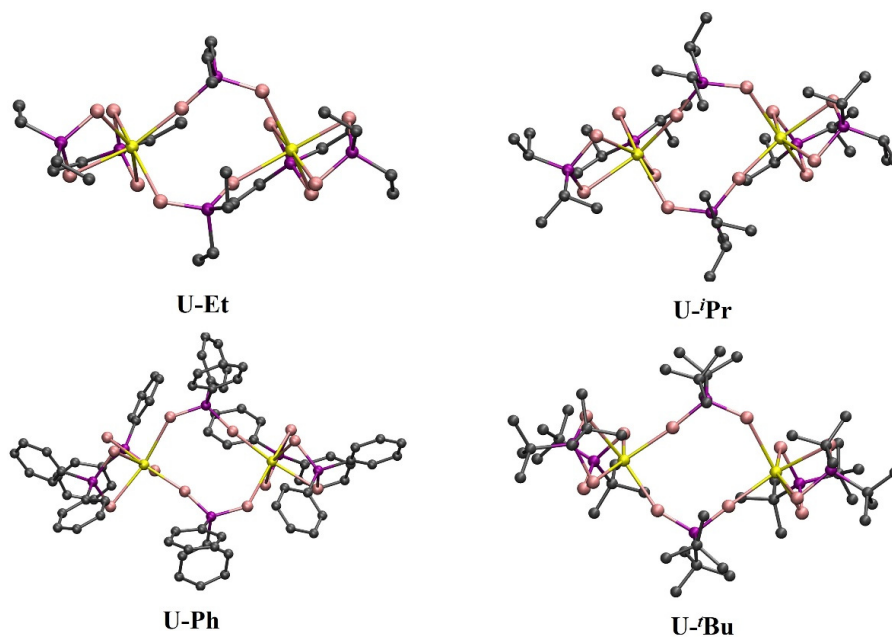

**Figure S30.** DFT optimized structure of **U-Et (model)**, **U-*i*Pr**, **U-Ph**, and **U-*t*Bu** complexes. Atoms are color coded as follows: U (yellow), B (pink), P (purple), carbon (gray). Hydrogen atoms are omitted for clarity.

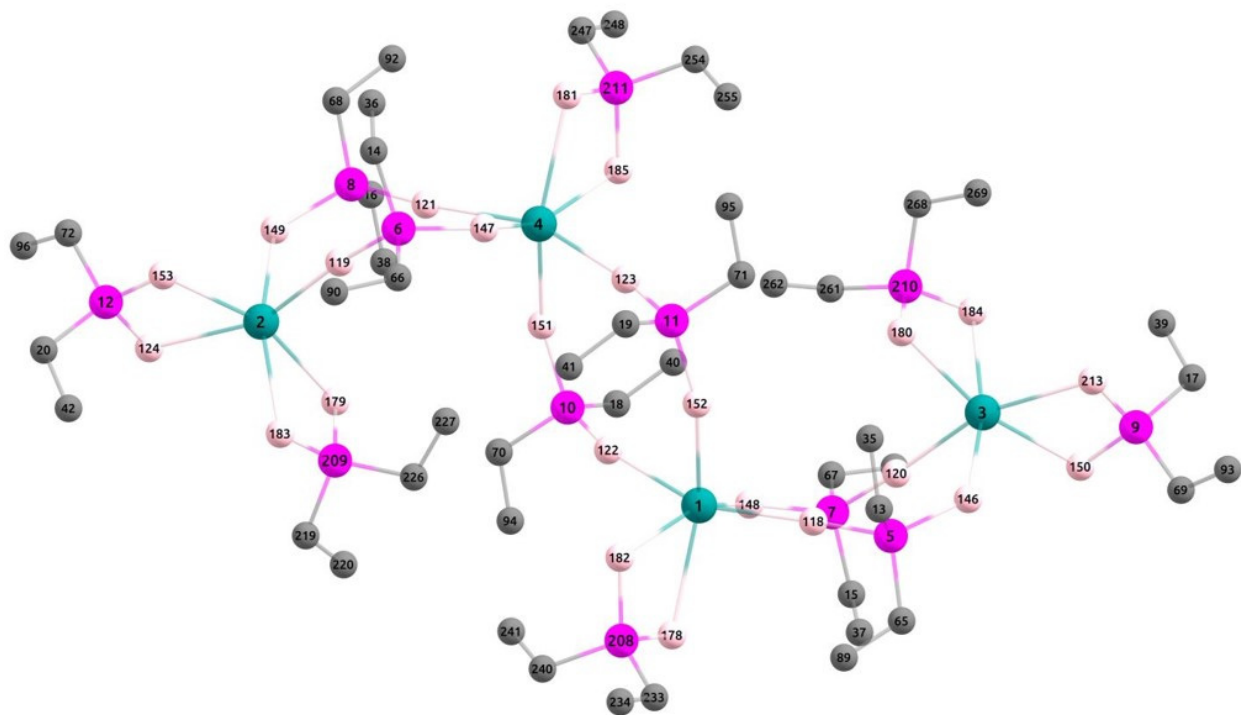

**Figure S31.** DFT optimized (TPSS-D3/def2-SV(P), def2-TZVP for Nd) **Nd-Et-4** complex with atom labels shown. Atoms are color coded as follows: Nd (cyan), B (pink), P (purple), C (gray). Hydrogen atoms are omitted for clarity.

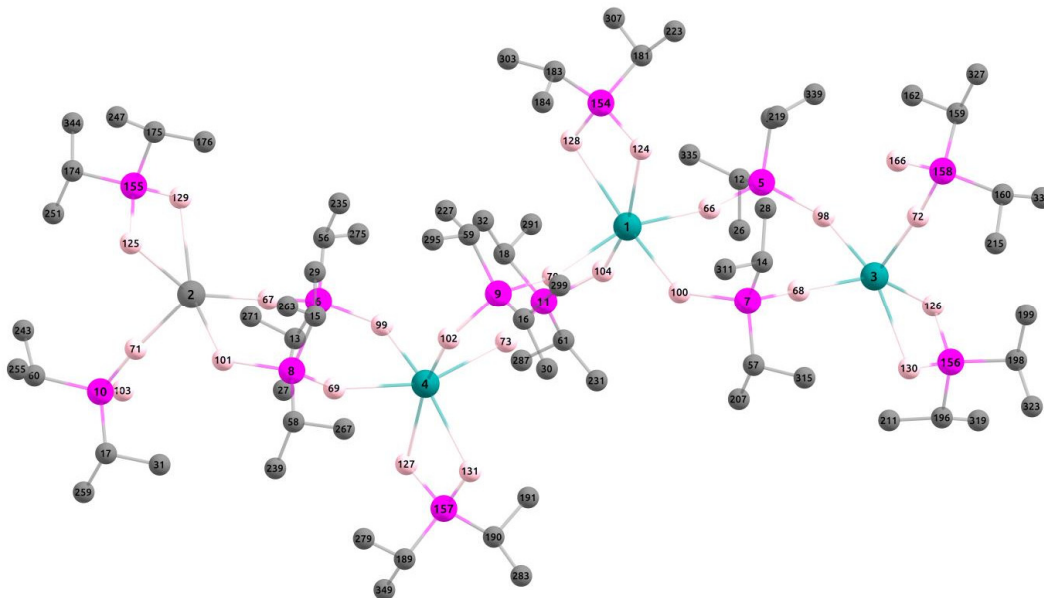

**Figure S32.** DFT optimized (TPSS-D3/def2-SV(P), def2-TZVP for Nd)  $\text{Nd-}i\text{Pr-4}$  complex with atom labels shown. Atoms are color coded as follows: Nd (cyan), B (pink), P (purple), C (gray).

Hydrogen atoms are omitted for clarity.
